# Supplementary material
Source: PubMed Central journal article supplement (PMC8884714)
Supplement: NIHMS1779074-supplement-Supplemental_Figure_1.pdf [file NIHMS1779074-supplement-Supplemental_Figure_1.pdf]

## Supplemental Figure 1

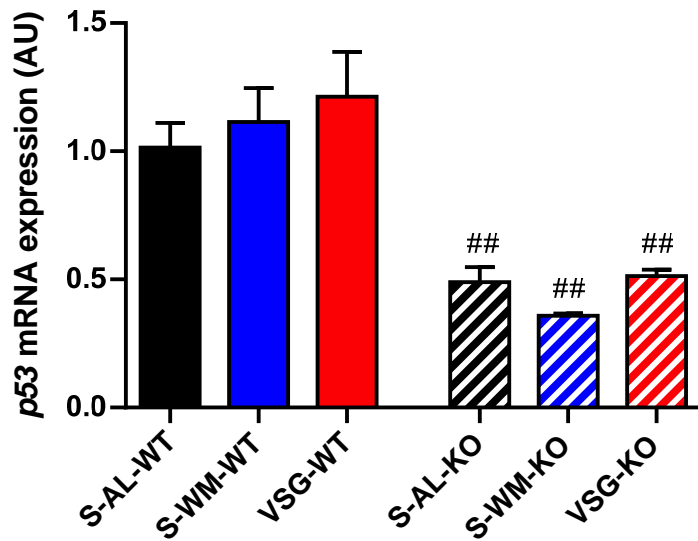

**Supplemental Figure 1. *p53* knockdown efficiency in hepatocyte-specific mouse model.** Hepatic *p53* mRNA expression. ## $p < 0.01$  compared with S-AL-WT by two-factor ANOVA.
