# Supplementary material
Source: PubMed Central journal article supplement (PMC8884714)
Supplement: NIHMS1779074-supplement-Supplemental_Figure_2.pdf [file NIHMS1779074-supplement-Supplemental_Figure_2.pdf]

## Supplemental Figure 2

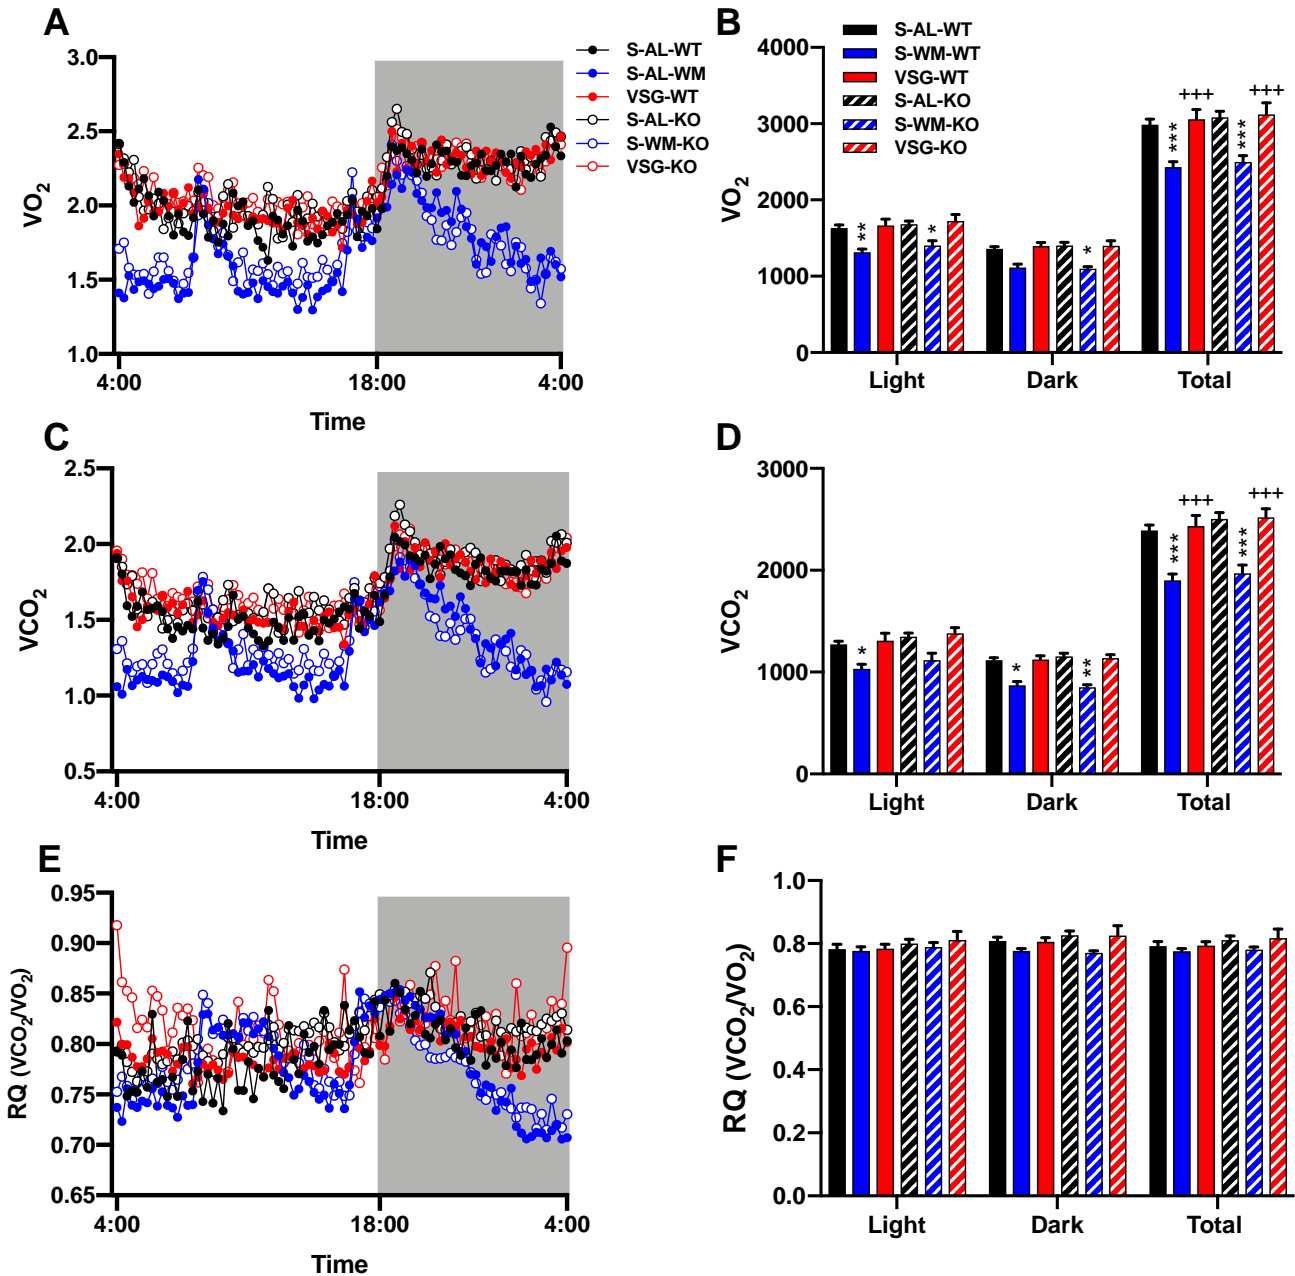

**Supplemental Figure 2. Hepatocyte-specific p53 ablation does not alter respiratory quotient (RQ).** A)  $O_2$  consumption ( $VO_2$ ) over time, B) light cycle, dark cycle, and total  $VO_2$ , C)  $CO_2$  expiration ( $VCO_2$ ) over time, D) light cycle, dark cycle, and total  $VCO_2$ , E) RQ over time, and F) light cycle, dark cycle, and total average RQ. \* $p < 0.05$ , \*\* $p < 0.01$ , \*\*\* $p < 0.0001$  compared with S-AL; +++ $p < 0.0001$  compared with S-WM by three-factor ANOVA.
