# Supplementary material
Source: PubMed Central journal article supplement (PMC8884714)
Supplement: NIHMS1779074-supplement-Supplemental_Figure_3.pdf [file NIHMS1779074-supplement-Supplemental_Figure_3.pdf]

### Supplemental Figure 3

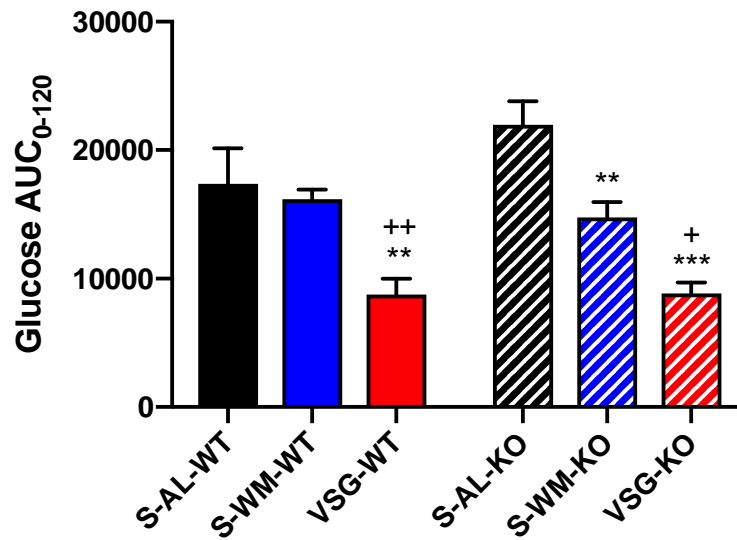

**Supplemental Figure 3. Effect of hepatocyte-specific p53 ablation and VSG on glucose area under the curve during an OGTT.** Glucose area under the curve (AUC). \*\* $p < 0.01$ , \*\*\* $p < 0.0001$  compared with S-AL; + $p < 0.05$ , ++ $p < 0.01$  compared with S-WM by two-factor ANOVA.
