# Supplementary material
Source: PubMed Central journal article supplement (PMC8884714)
Supplement: NIHMS1779074-supplement-Supplemental_Figure_4.pdf [file NIHMS1779074-supplement-Supplemental_Figure_4.pdf]

## Supplemental Figure 4

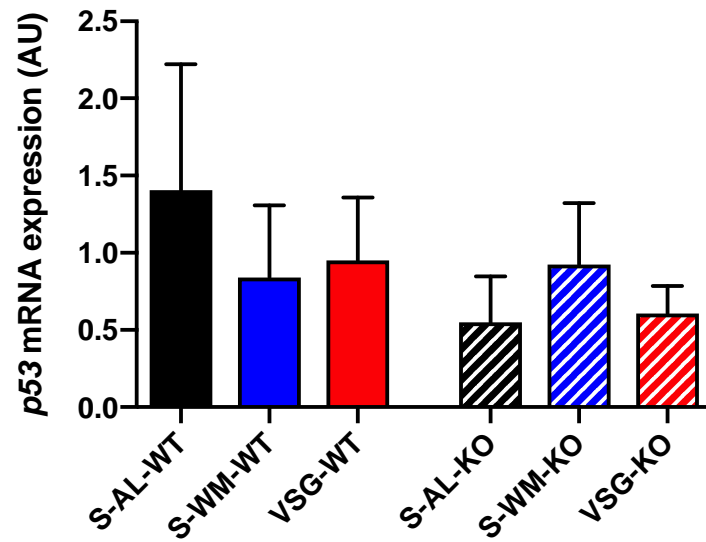

**Supplemental Figure 4. Hepatocyte-specific p53 ablation does not alter WAT p53 mRNA expression.** WAT p53 mRNA expression measured in epididymal fat depots.
